# Supplementary material for: Direct determination of Cd in NaCl containing metallothionein fractions of different red mullet tissues by GF-AAS
Source: Royal Society of Chemistry journal article supplement (doi:10.1039/b504680g), 2005-01-01

Direct determination of Cd in NaCl containing metallothionein fractions  
of different red mullet tissues by GF-AAS

Zrinka Dragun\* and Biserka Raspor

Ruđer Bošković Institute, Center for Marine and Environmental Research, POBox  
180, 10002 Zagreb, Croatia

\* phone: xx385-1-4680216;  
fax: xx385-1-4680242;  
e-mail: zdragun@rudjer.irb.hr

**Table 1.** Precision and recovery of Cd measurement in standard solutions of Cd in 0.9% NaCl (n = 10)

| <b>Concentration of Cd, µg/L</b> | <b>Mean measured Cd concentration, µg/L</b> | <b>SD µg/L</b> | <b>RSD %</b> | <b>Recovery %</b> |
|----------------------------------|---------------------------------------------|----------------|--------------|-------------------|
| <b>0.050</b>                     | 0.041                                       | 0.006          | 13.5         | 82.0              |
| <b>0.050</b>                     | 0.055                                       | 0.004          | 7.6          | 110.0             |
| <b>0.150</b>                     | 0.150                                       | 0.004          | 2.8          | 100.0             |
| <b>0.300</b>                     | 0.309                                       | 0.007          | 2.4          | 103.0             |
| <b>0.500</b>                     | 0.508                                       | 0.009          | 1.7          | 101.6             |
| <b>0.800</b>                     | 0.793                                       | 0.018          | 2.3          | 99.1              |
| <b>1.000</b>                     | 1.044                                       | 0.013          | 1.2          | 104.4             |
| <b>1.150</b>                     | 1.160                                       | 0.073          | 6.3          | 100.9             |

**Table 2.** Precision of Cd measurement in heat-treated cytosol (S50) of different red mullet tissues (n = 10)

| <b>Tissue sample</b>      | <b>Mean measured Cd concentration, µg/L</b> | <b>SD µg/L</b> | <b>RSD %</b> |
|---------------------------|---------------------------------------------|----------------|--------------|
| <b>Brain sample 1</b>     | 0.068                                       | 0.006          | 8.7          |
| <b>Brain sample 2</b>     | 0.115                                       | 0.005          | 4.4          |
| <b>Brain sample 3</b>     | 0.129                                       | 0.005          | 3.9          |
| <b>Liver sample 1</b>     | 0.387                                       | 0.006          | 1.6          |
| <b>Liver sample 2</b>     | 0.644                                       | 0.006          | 1.0          |
| <b>Liver sample 3</b>     | 0.517                                       | 0.008          | 1.5          |
| <b>Kidney sample 1</b>    | 0.420                                       | 0.010          | 2.3          |
| <b>Kidney sample 2</b>    | 0.469                                       | 0.007          | 1.5          |
| <b>Kidney sample 3</b>    | 0.222                                       | 0.011          | 4.8          |
| <b>Intestine sample 1</b> | 0.464                                       | 0.009          | 1.9          |
| <b>Intestine sample 2</b> | 0.333                                       | 0.007          | 2.2          |
| <b>Intestine sample 3</b> | 1.064                                       | 0.008          | 0.7          |
| <b>Intestine sample 4</b> | 0.228                                       | 0.005          | 2.1          |

**Table 3.** Recovery of Cd in spiked heat-treated cytosol of different red mullet tissues. The samples were spiked in such a way that one volume of sample was mixed with one volume of appropriate standard solution.

| <b>Tissue sample</b>      | <b>Cd sample concentration<br/>μg/L<br/>(*n=10; **n=5)</b> | <b>Cd standard solution concentration<br/>μg/L</b> | <b>Expected Cd concentration in spiked sample<br/>μg/L</b> | <b>Measured Cd concentration<br/>μg/L<br/>n = 5</b> | <b>RSD %</b> | <b>Recovery %</b> |
|---------------------------|------------------------------------------------------------|----------------------------------------------------|------------------------------------------------------------|-----------------------------------------------------|--------------|-------------------|
| <b>Brain sample 1</b>     | *0.068 ± 0.006                                             | 0.150                                              | 0.109                                                      | 0.160 ± 0.007                                       | 4.7          | 146.8             |
| <b>Brain sample 2</b>     | *0.115 ± 0.005                                             | 0.300                                              | 0.208                                                      | 0.220 ± 0.010                                       | 4.7          | 105.8             |
| <b>Brain sample 3</b>     | *0.129 ± 0.005                                             | 0.300                                              | 0.215                                                      | 0.227 ± 0.007                                       | 3.0          | 105.6             |
| <b>Brain sample 4</b>     | **0.138 ± 0.006                                            | 0.300                                              | 0.219                                                      | 0.215 ± 0.005                                       | 2.4          | 98.2              |
| <b>Brain sample 5</b>     | **0.080 ± 0.003                                            | 0.300                                              | 0.190                                                      | 0.200 ± 0.005                                       | 2.3          | 105.3             |
| <b>Brain sample 6</b>     | **0.075 ± 0.007                                            | 0.150                                              | 0.113                                                      | 0.126 ± 0.004                                       | 3.1          | 111.5             |
| <b>Liver sample 1</b>     | *0.387 ± 0.006                                             | 1.150                                              | 0.769                                                      | 0.844 ± 0.016                                       | 1.9          | 109.8             |
| <b>Liver sample 2</b>     | *0.644 ± 0.006                                             | 1.400                                              | 1.022                                                      | 0.984 ± 0.027                                       | 2.8          | 96.3              |
| <b>Liver sample 3</b>     | *0.517 ± 0.008                                             | 1.400                                              | 0.959                                                      | 0.833 ± 0.020                                       | 2.5          | 86.9              |
| <b>Liver sample 4</b>     | **0.449 ± 0.004                                            | 1.400                                              | 0.925                                                      | 0.863 ± 0.027                                       | 3.1          | 93.3              |
| <b>Liver sample 5</b>     | **0.835 ± 0.007                                            | 1.400                                              | 1.118                                                      | 0.994 ± 0.040                                       | 4.0          | 88.9              |
| <b>Liver sample 6</b>     | **0.409 ± 0.004                                            | 1.150                                              | 0.780                                                      | 0.734 ± 0.025                                       | 3.5          | 94.1              |
| <b>Kidney sample 1</b>    | *0.420 ± 0.010                                             | 1.150                                              | 0.785                                                      | 0.793 ± 0.031                                       | 3.9          | 101.0             |
| <b>Kidney sample 2</b>    | *0.469 ± 0.007                                             | 1.150                                              | 0.810                                                      | 0.800 ± 0.009                                       | 1.1          | 98.8              |
| <b>Kidney sample 3</b>    | *0.222 ± 0.011                                             | 0.500                                              | 0.361                                                      | 0.384 ± 0.005                                       | 1.4          | 106.4             |
| <b>Intestine sample 1</b> | *0.464 ± 0.009                                             | 1.400                                              | 0.932                                                      | 0.937 ± 0.013                                       | 1.4          | 100.5             |
| <b>Intestine sample 2</b> | *0.333 ± 0.007                                             | 1.000                                              | 0.667                                                      | 0.687 ± 0.010                                       | 1.4          | 103.0             |
| <b>Intestine sample 4</b> | *0.228 ± 0.005                                             | 0.800                                              | 0.514                                                      | 0.511 ± 0.011                                       | 2.1          | 99.4              |

## Figure captions

**Figure 1.** Cd and background signals obtained after addition of various volumes of EDTA ( $6.0 \text{ g L}^{-1}$ ), of two different pH values: a) pH of EDTA solution was  $\sim 4.5$ , and volume  $5 \text{ }\mu\text{L}$ ; b) pH of EDTA solution was  $\sim 4.5$ , and volume  $10 \text{ }\mu\text{L}$ ; c) pH of EDTA solution was  $\sim 4.5$ , and volume  $15 \text{ }\mu\text{L}$ ; d) pH of EDTA solution was  $\sim 7.0$ , and volume  $5 \text{ }\mu\text{L}$ . All signals were obtained using solution of Cd in  $0.9\%$  NaCl ( $c_{\text{Cd}} = 1.5 \text{ }\mu\text{g L}^{-1}$ ).

**Figure 2.** Effect of atomisation temperature on Cd and background signals.

a)  $\blacktriangle$  Slope of a calibration straight line created using bulk standard solution of Cd in  $0.9\%$  NaCl ( $c_{\text{Cd}} = 0.8 \text{ }\mu\text{g L}^{-1}$ ) and EDTA (pH  $\sim 7.0$ ) as a modifier;  $\Delta$  Background absorbance recorded at calibration zero.

b)  $\circ$  Cd concentration in heat-treated cytosol of red mullet kidney;  $\bullet$  Cd concentration in standard solution of Cd in  $0.9\%$  NaCl ( $c_{\text{Cd}} = 0.5 \text{ }\mu\text{g L}^{-1}$ );  $\square$  Cd concentration in heat-treated cytosol of red mullet intestine.

**Figure 3.** Background signals recorded at calibration zero: a) signal obtained using blank solution of  $0.9\%$  NaCl with addition of EDTA; b) signal obtained using only blank solution of  $0.9\%$  NaCl, without addition of EDTA; c) signal obtained using Milli-Q water with addition of EDTA.

**Figure 4.** Calibration straight line created at 11 different occasions with addition of EDTA, using bulk standard solution of Cd in  $0.9\%$  NaCl ( $c_{\text{Cd}} = 0.8 \text{ }\mu\text{g L}^{-1}$ ) and heating program from Table 1.

**Figure 5.** The comparison of metallothionein level (MT) and background absorbance (BG) in heat-treated cytosol of four tissues of red mullet (K-kidney; IN-intestine; L-liver; B-brain). A small inserted figure represents linear regression graph illustrating high correlation between MTs and BG.

**Figure 1.**

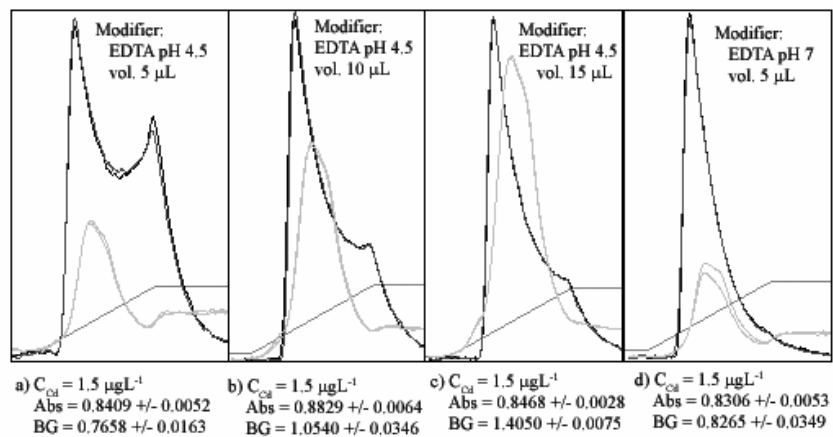

**Figure 2.**

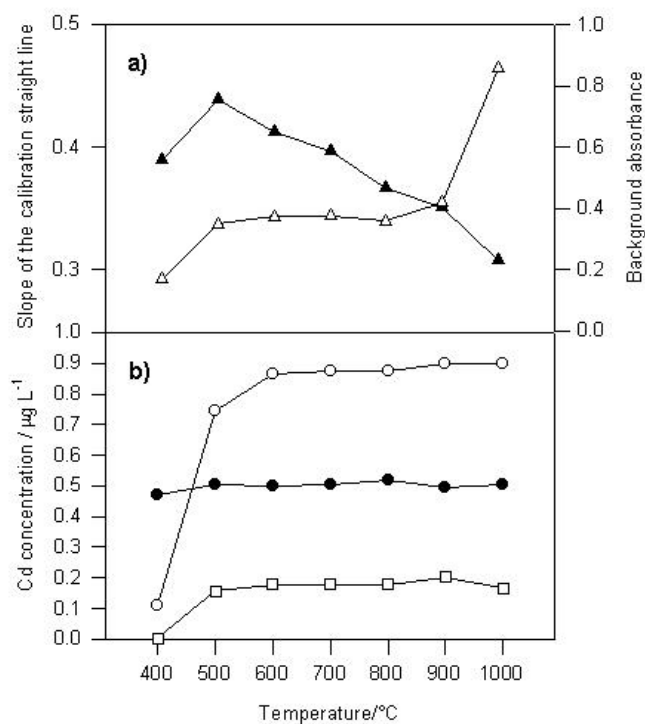

**Figure 3.**

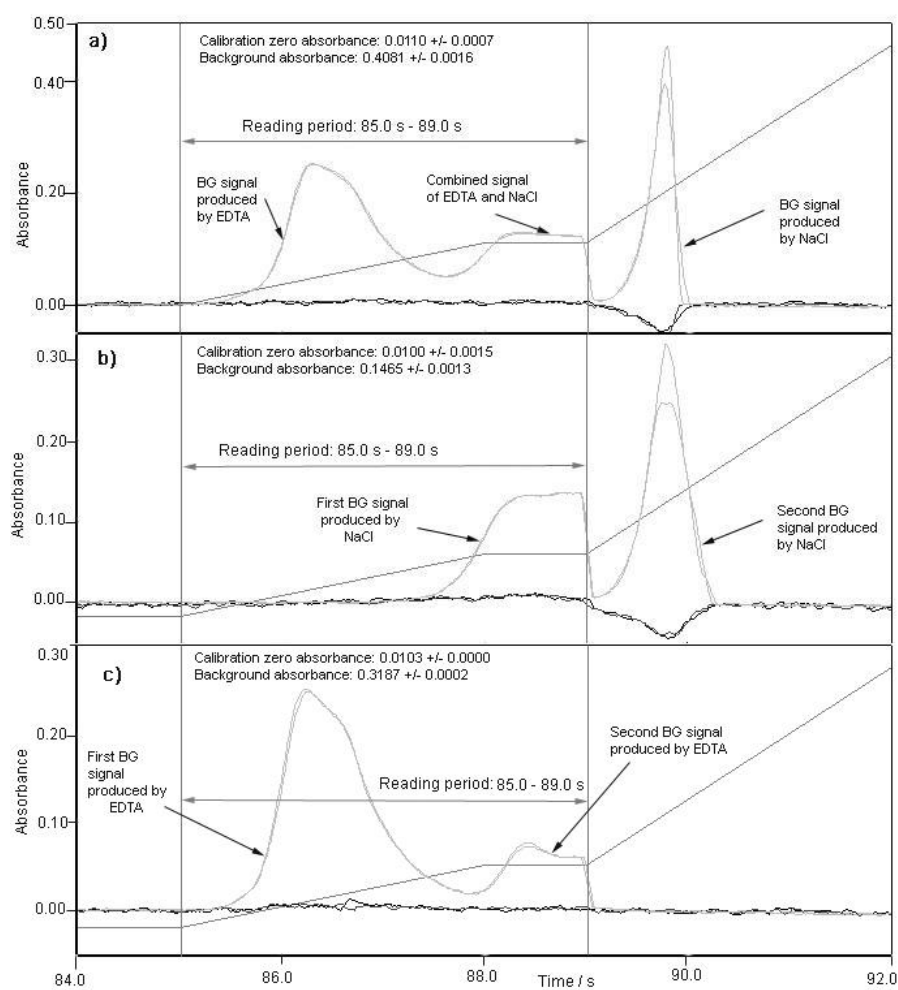

**Figure 4.**

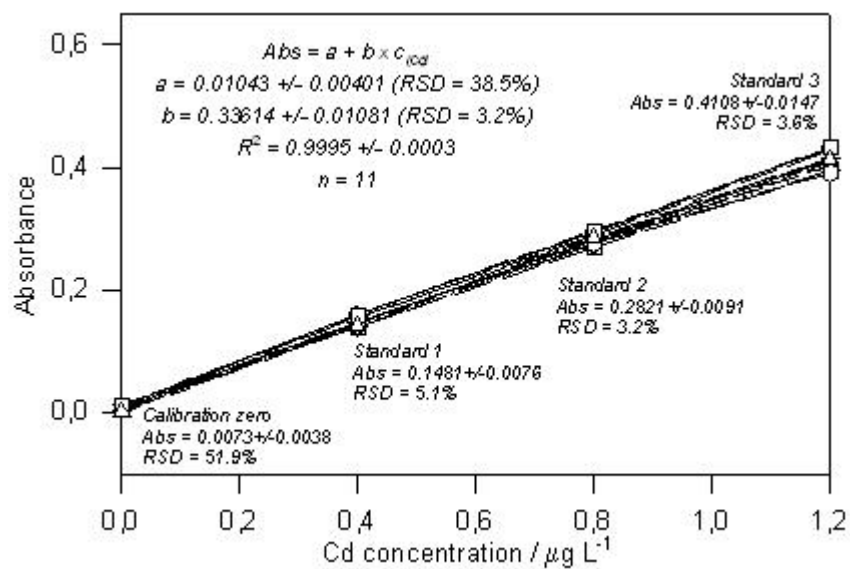

**Figure 5.**

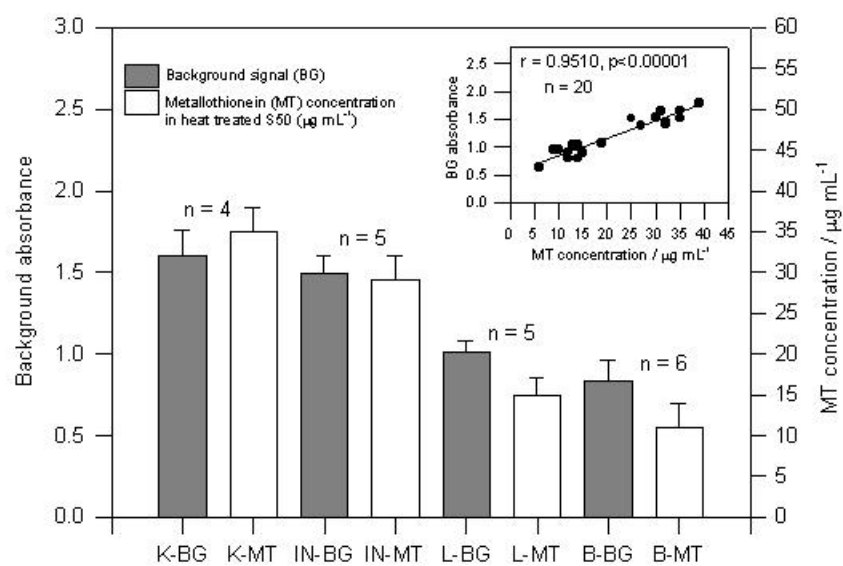

Supplement: jaas_esi.pdf [file jaas_esi.pdf]
